# Supplementary material for: Association of peptic ulcer disease with obesity, nutritional components, and blood parameters in the Korean population
Source: PubMed Central journal article supplement (PMC5570349; doi:10.1371/journal.pone.0183777), 2017-08-24
Supplement: pone.0183777.s001.pdf [file pone.0183777.s001.pdf]

**Study cohort**  
**N=39,311**

**Selected data**  
**N=39,040**

**Excluded data**  
**(missing data in age and sex)**  
**N=271**

**Selected data**  
**N=38,735**  
**Non-patients *n*=36,629**  
**Patients *n*=2,103**

**Excluded data**  
**(missing data and people**  
**without diagnosis results)**  
**N=305**

**Non-patients**  
**N=4,176**  
**Male *n*=1,944**  
**Female *n*=2,232**

**Patients**  
**N=476**  
**Male *n*=182**  
**Female *n*=294**

**Excluded data**  
**N=34,103**  
**(missing the following data:**  
**Demographic *n*=509**  
**Anthropometry *n*=28,575**  
**Vital signs *n*=36**  
**Intake (24 h) *n*=1,757**  
**Healthy interview *n*=1,555**  
**Other *n*=1,671)**
